# Supplementary material for: Pd nanocrystals encapsulated in MOF-derived Ni/N-doped hollow carbon nanosheets for efficient thermal CO oxidation: unveiling the effect of porosity
Source: Royal Society of Chemistry journal article supplement (doi:10.1039/d3cy00623a), 2023-01-01
Supplement: d3cy00623a1.pdf [file d3cy00623a1.pdf]

**Pd Nanocrystals Encapsulated in Ni-Metal-organic Framework-derived Hollow Nanostructure Carbon for Efficient Thermal CO  
Oxidation: Unveiling the Effect of Porosity**

Adewale K. Ipadeola<sup>a,b,†</sup>, Ahmed Gamal<sup>a,b,c,†</sup>, Aboubakr M. Abdullah<sup>a,\*</sup>, Kenneth I. Ozoemena<sup>c</sup> and Kamel Eid<sup>b,\*</sup>

<sup>a</sup>Center for Advanced Materials, Qatar University, Doha 2713, Qatar.

<sup>b</sup>Gas Processing Center(GPC), College of Engineering, Qatar University, Doha 2713, Qatar.

<sup>c</sup>Molecular Science Institute, School of Chemistry, University of the Witwatersrand, Private Bag 3, PO Wits, Johannesburg, South Africa

<sup>†</sup> Contributed equally to this work

\*Corresponding authors: bakr@qu.edu.qa; kenneth.ozoemena@wits.ac.za; kamel.eid@qu.edu.qa

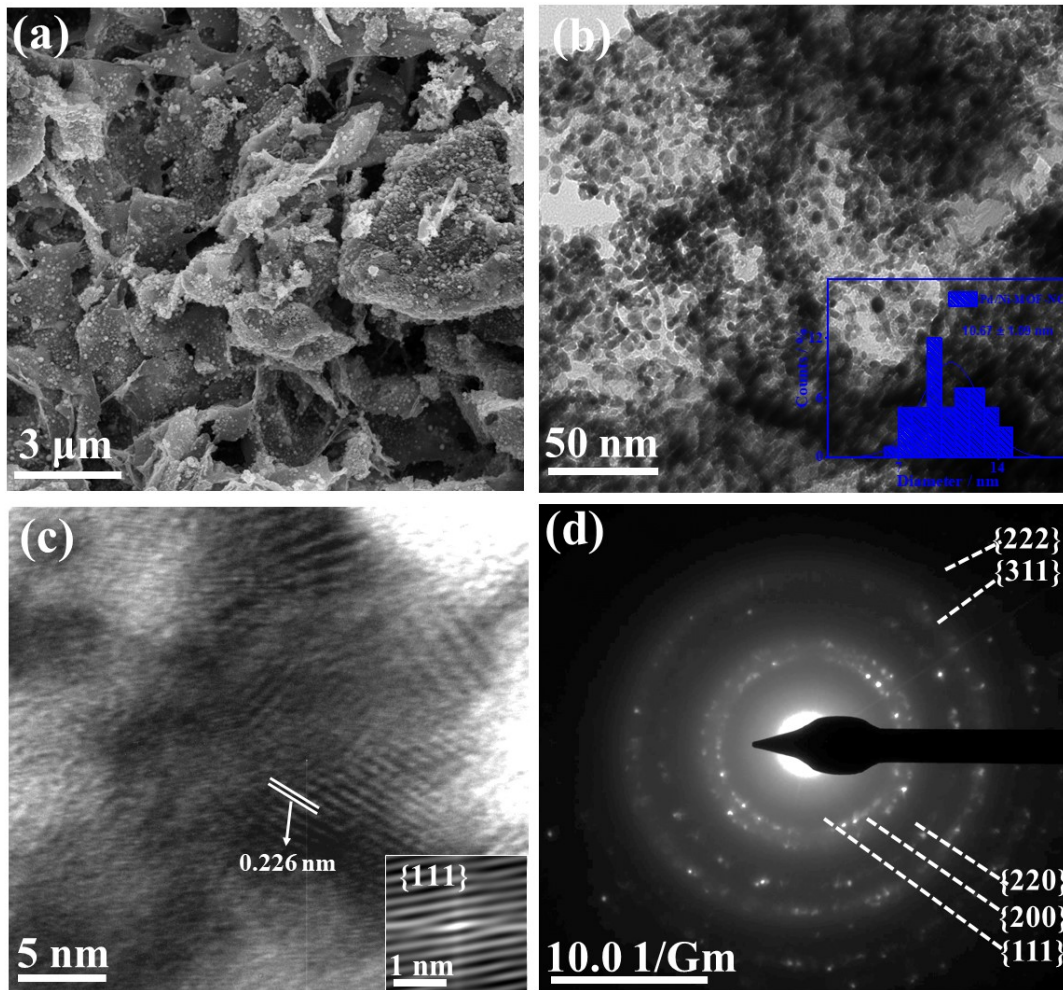

Fig. S1. (a) SEM, (b) TEM with nanoparticle size distribution, (c) HRTEM, and (d) SAED of Pd/Ni-MOF-NC.

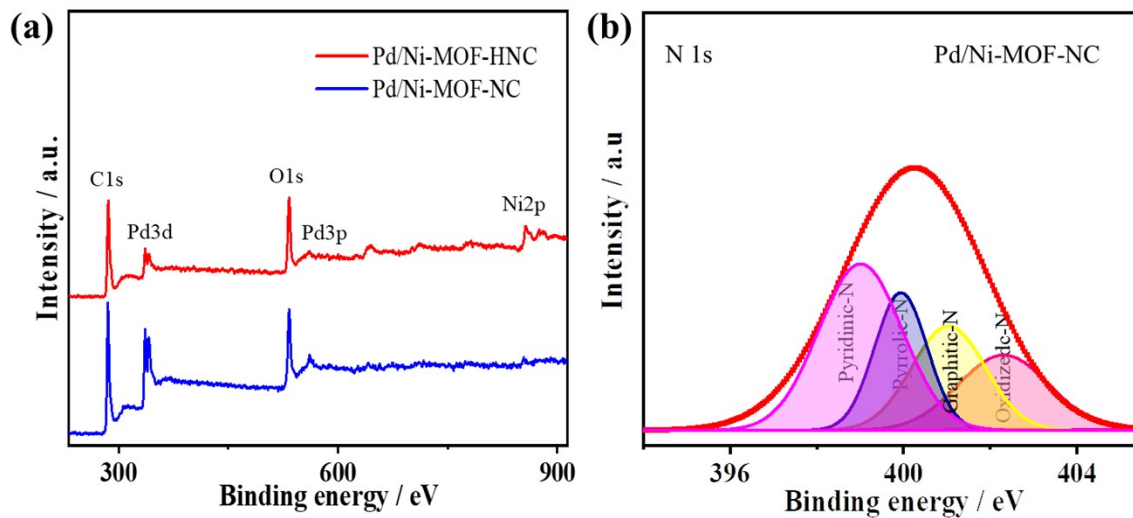

Fig. S2. (a) XPS full-scan of Pd/Ni-MOF-HNC and Pd/Ni-MOF-NC, and (b) high-resolution N 1s of Pd/Ni-MOF-NC.

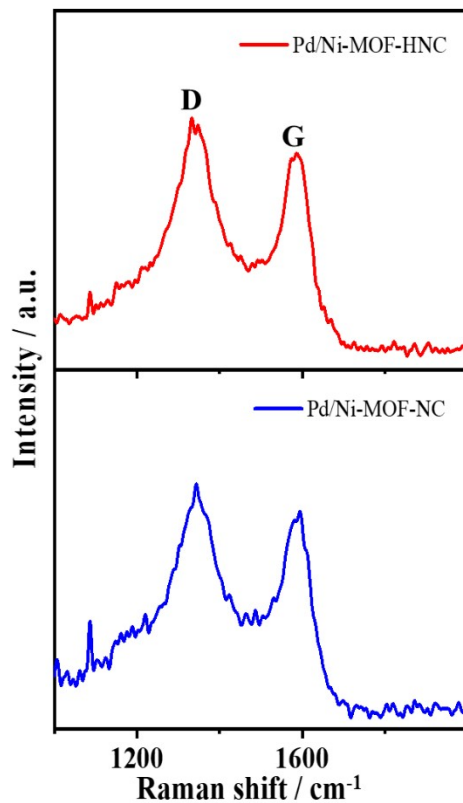

**Fig. 3.** Raman of Pd/Ni-MOF-HNC and Pd/Ni-MOF-NC.

**Table S1.** The comparison of low-temperature CO oxidation activity of the as-synthesized catalysts with Pd-based catalysts in the literature.

| Catalysts                                  | Preparation methods                   | Morphology                | $T_{100}$ (°C) | Refs         |
|--------------------------------------------|---------------------------------------|---------------------------|----------------|--------------|
| Pd/Ni-MOF-HNC                              | Microwave-irradiation                 | Porous nanosheets         | 114.4          | This work    |
| Pd/Ni-MOF-NC                               | Microwave-irradiation                 | Nanosheets                | 153.8          | This work    |
| Pd/CeSn75-800                              | Counter precipitation/<br>calcination | Core-shell                | ~ 100          | <sup>1</sup> |
| Pd@SiO <sub>2</sub> /TiO <sub>2</sub> -500 | Precipitation/ calcination            | Core-shell                | ~ 400          | <sup>2</sup> |
| CeO <sub>2</sub> -Pd/S-800-5h              | Impregnation/ calcination             | 2d hexagonal<br>mesopores | ~ 75           | <sup>3</sup> |

|                                                                                            |                                      |                              |            |    |
|--------------------------------------------------------------------------------------------|--------------------------------------|------------------------------|------------|----|
| Pd <sub>1</sub> @HEFO<br>Pd@CeO <sub>2</sub>                                               | Ball milling/ annealing/etching      | Cubic                        | 170<br>253 | 4  |
| Pd/MgO(5)-h-BN                                                                             | Impregnation/<br>calcination         | Nanosheets                   | 140        | 5  |
| Ce <sub>1-x</sub> Pd <sub>x</sub> O <sub>2-δ</sub> (PC3)                                   | hydrothermal/reduction/calcination   | Nanocrystals                 | ~ 95       | 6  |
| Pd/MgAl-HT                                                                                 | Deposition-precipitation             | Nanocrystals                 | ~ 90       | 7  |
| Pd-1%P                                                                                     | Wet-<br>impregnation/ calcination    | Fiber-like lamellar          | ~ 270      | 8  |
| LaAlPd(0.8)O <sub>3</sub> -600                                                             | Impregnation/<br>Calcination         | Perovskite                   | ~ 325      | 9  |
| Pd@SiO <sub>2</sub> -673                                                                   | Polymerization/calcination           | Core-shell                   | ~ 130      | 10 |
| Pd <sub>0.83</sub> Co <sub>0.17</sub> /C                                                   | Wet impregnation                     | Nanocrystals                 | 150        | 11 |
| Pd <sub>0.5</sub> /CeHfZrSnErO <sub>x</sub><br>Pd <sub>1.0</sub> /CeHfZrSnErO <sub>x</sub> | Ultrasound-mediated co-precipitation | Cubic                        | 140<br>150 | 12 |
| Pd-SSZ-13                                                                                  | Ion exchange/ calcination            | Cubic particles              | ~ 175      | 13 |
| PdO <sub>x</sub> /CeO <sub>2</sub>                                                         | Radio frequency sputtering           | Dendrite-like                | 250        | 14 |
| 4%Pd/R-CeO <sub>2</sub>                                                                    | Impregnation/ annealing              | Rod, cubic and<br>octahedral | 50         | 15 |
| Pd-Cu/gC <sub>3</sub> N <sub>4</sub> NWs                                                   | Protonation/annealing                | Nanowires                    | 149        | 16 |
| Pd/Cu/gC <sub>3</sub> N <sub>4</sub> NTs                                                   | Protonation/annealing                | Nanotubes                    | 154        | 17 |
| Au/Pd/gC <sub>3</sub> N <sub>4</sub> NFs                                                   | Protonation/annealing                | Nanofibers                   | 144        | 18 |
| Pd-impeded 3D porous<br>graphene (3D Pd-E-PG)                                              | Low-power microwave radiation        | 3D porous<br>nanosheets      | 190        | 19 |

|                       |                          |             |     |    |
|-----------------------|--------------------------|-------------|-----|----|
| AuPd/TiO <sub>2</sub> | Incipient wetness method | Nanospheres | 190 | 20 |
|-----------------------|--------------------------|-------------|-----|----|

MOF-derived hollow N-doped carbon (MOF-HNC) nanostructures, MOF-derived N-doped carbon (MOF-NC) nanostructure, high-entropy fluorite oxide (HEFO), hexagonal boron nitride (h-BN), calcination at 500 °C for 18 h (PC3), hydrothermalite-like (HT), SSZ-13 zeolites (SSZ-13), rod-like (R)

## References

- O. A. Stonkus, A. V. Zadesenets, E. M. Slavinskaya, A. I. Stadnichenko, V. A. Svetlichnyi, Y. V. Shubin, S. V. Korenev and A. I. Boronin, *Catal. Commun.*, 2022, **172**, 106554.
- A. Takabayashi, F. Kishimoto, H. Tsuchiya, H. Mikami and K. Takanabe, *Nanoscale Adv.*, 2023, **5**, 1124-1132.
- P. R. Murthy, S. Munsif, J.-C. Zhang and W.-Z. Li, *Industrial & Engineering Chemistry Research*, 2021, **60**, 14424-14433.
- H. Xu, Z. Zhang, J. Liu, C.-L. Do-Thanh, H. Chen, S. Xu, Q. Lin, Y. Jiao, J. Wang and Y. Wang, *Nat. Commun.*, 2020, **11**, 3908.
- L. Li, X. Liu, H. He, N. Zhang, Z. Liu and G. Zhang, *Catal. Today*, 2019, **332**, 214-221.
- J. Ye, Y. Xia, D.-g. Cheng, F. Chen and X. Zhan, *Int. J. Hydrog. Energy*, 2019, **44**, 17985-17994.
- X. Lin, J. Zhou, Y. Fan, Y. Zhan, C. Chen, D. Li and L. Jiang, *Dalton Trans.*, 2018, **47**, 14938-14944.
- J. Dong, J. Wang, J. Wang, M. Yang, W. Li and M. Shen, *Catal. Sci. Technol.*, 2017, **7**, 5038-5048.
- Y. J. Kim, J. H. Lim, B. K. Cho, S. B. Hong, I.-S. Nam and J. W. Choung, *J. Catal.*, 2015, **330**, 71-83.
- Y. Xu, J. Ma, Y. Xu, L. Xu, L. Xu, H. Li and H. Li, *RSC Adv.*, 2013, **3**, 851-858.
- I. B. Aragão, F. R. Estrada, D. H. Barrett and C. B. Rodella, *Mol. Catal.*, 2022, **526**, 112377.
- F. Okejiri, J. Fan, Z. Huang, K. M. Siniard, M. Chi, F. Polo-Garzon, Z. Yang and S. Dai, *isience*, 2022, **25**, 104214.
- D. Chen, H. Lei, W. Xiong, Y. Li, X. Ji, J.-Y. Yang, B. Peng, M. Fu, P. Chen and D. Ye, *ACS Catal.*, 2021, **11**, 13891-13901.
- L. S. Kibis, A. A. Simanenko, A. I. Stadnichenko, V. I. Zaikovskii and A. I. Boronin, *J. Phys. Chem. C*, 2021, **125**, 20845-20854.
- X. Zhang, W. Li, Z. Zhou, K. Chen, M. Wu and L. Yuan, *Mol. Catal.*, 2021, **508**, 111580.
- K. Eid, Y. H. Ahmad, A. T. Mohamed, A. G. Elsafy and S. Y. Al-Qaradawi, *Catalysts*, 2018, **8**, 411.
- K. Eid, M. H. Sliem, K. Jlassi, A. S. Eldesoky, G. G. Abdo, S. Y. Al-Qaradawi, M. A. Sharaf, A. M. Abdullah and A. A. Elzatahry, *Inorg. Chem. Commun*, 2019, **107**, 107460.
- K. Eid, M. H. Sliem, A. S. Eldesoky, H. Al-Kandari and A. M. Abdullah, *Int. J. Hydrog. Energy*, 2019, **44**, 17943-17953.
- R. Kumar, J.-H. Oh, H.-J. Kim, J.-H. Jung, C.-H. Jung, W. G. Hong, H.-J. Kim, J.-Y. Park and I.-K. Oh, *ACS nano*, 2015, **9**, 7343-7351.
- A. Teixeira-Neto, R. Gonçalves, C. Rodella, L. Rossi and E. Teixeira-Neto, *Catalysis Science & Technology*, 2017, **7**, 1679-1689.
